# Supplementary material for: Case report: Double mutations in a patient with early-onset Alzheimer’s disease in China, PSEN2 and IDE variants
Source: Front Neurosci. 2024 Oct 30;18:1423892. doi: 10.3389/fnins.2024.1423892 (PMC11557526; doi:10.3389/fnins.2024.1423892)
Supplement: Supplementary file 1 [file Table_1.xlsx]

## Sheet: Sheet1
Chromosome number	Gene
chr6	AARS2
chr19	ABCA7
chr17	ABI3
chr7	AC099552.4
chr17	ACE
chr15	ADAM10
chr2	ADAM17
chr21	ADAMTS1
chr7	AKAP9
chr3	ALCAM
chr15	ANP32A
chr19	APOE
chr21	APP
chr19	ARHGAP35
chr11	BACE1
chr21	BACE2
chr3	BCHE
chr16	BCL7C
chr2	BIN1
chr3	BSN
chr6	BTNL2
chr17	BZRAP1-AS1
chr17	C17orf107
chr17	C17orf107,CHRNE
chr19	C3
chr9	C9orf72
chr10	CASP7
chr20	CASS4
chr7	CCM2
chr16	CCNF
chr6	CD2AP
chr19	CD33
chr7	CDK5
chr11	CELF1
chr22	CHCHD10
chr3	CHMP2B
chr17	CHRNE
chr4	CLNK
chr8	CLU
chr12	CNTN1
chr13	COL4A1
chr13	COL4A2
chr13	COL4A2,COL4A1
chr1	CR1
chr5	CSF1R
chr20	CST3
chr20	CTSA
chr11	CTSC
chr11	CTSD
chr16	CYLD
chr2	DCTN1
chr18	DSG2
chr1	DUSP10
chr1	ECE1
chr3	ECE2
chr10	ECHDC3
chr3	EDEM1
chr2	EIF2AK3
chr7	EPHA1
chr2	ERBB4
chr14	FERMT2
chrX	FMR1
chr16	FUS
chr17	GAA
chr15	GABRB3
chr1	GBA
chr14	GCH1
chr8	GFRA2
chrX	GLA
chr8	GPAA1
chr13	GPC6
chr17	GRN
chr3	GSK3B
chr9	GSN
chr11	HBB
chr5	HBEGF
chr6	HLA-DRB1
chr6	HLA-DRB5
chr12	HNRNPA1
chr7	HNRNPA2B1
chr10	HTRA1
chr4	HTT
chr10	IDE
chr15	IGF1R
chr14	IGHG3
chr16	IL34
chr2	INPP5D
chr16	IQCK
chr13	ITM2B
chr21	KCNJ15
chr7	KRIT1
chr16	LCMT1
chr14	LGMN
chr12	LRRK2
chr17	MAPT
chr1	MARK1
chr5	MEF2C
chr3	MME
chr1	MMEL1
chr20	MMP9
chr3	MOBP
chr11	MS4A6A
chr11	MS4A6E
chr1	MTHFR
chr2	NDUFAF7
chr7	NME8
chr19	NOTCH3
chr18	NPC1
chr14	NPC2
chr10	OPTN
chr3	PDCD10
chr11	PICALM
chr7	PILRA
chr7	PILRA,ZCWPW1
chr19	PIN1
chr16	PLCG2
chr19	PLD3
chr11	PPME1
chr5	PPP2CA
chr8	PPP2R2A
chr14	PPP2R5C
chr7	PRKAR1B
chr2	PRKD3
chr20	PRNP
chr14	PSEN1
chr1	PSEN2
chr8	PTK2B
chr11	RAB38
chr14	RIN3
chr13	RNASEH2B
chr17	RNF213
chr6	RUNX2
chr4	SCARB2
chr17	SCIMP
chr14	SERPINA1
chr8	SHARPIN
chr9	SIGMAR1
chr14	SLC24A4
chr12	SLCO1A2
chr4	SNCA
chr5	SNCB
chr21	SOD1
chr11	SORL1
chr8	SOX17
chr5	SQSTM1
chr1	STX6
chr1	TARDBP
chr12	TBK1
chr4	TET2
chr2	TIA1
chr7	TMEM106B
chr17	TP53
chr6	TREM2
chr6	TREML2
chr3	TREX1
chr17	TSPOAP1-AS1
chr21	TTC3
chr18	TTR
chr2	TUBA4A
chr9	UBQLN1
chrX	UBQLN2
chr19	UNC13A
chr4	UNC5C
chr9	VCP
chr16	VPS35
chr19	VRK3
chr16	WWOX
chr7	ZCWPW1
